# Supplementary material for: Protection and Alleviated Inflammation Induced by Virus-like Particle Vaccines Containing Plasmodium berghei MSP-8, MSP-9 and RAP1
Source: MDPI journal article supplement (doi:10.3390/vaccines10020203), 2022-01-27
Supplement: s1 [file s1]

**Protection and alleviated inflammation induced by virus-like particle vaccines containing *Plasmodium berghei* MSP-8, MSP-9 and RAP1**

Su-Hwa Lee <sup>1</sup>, Ki-Back Chu <sup>1,2</sup>, Hae-Ji Kang <sup>3</sup>, Fu-Shi Quan <sup>1,2,\*</sup>

<sup>1</sup> Department of Medical Zoology, School of Medicine, Kyung Hee University, Seoul 02447, Korea

<sup>2</sup> Medical Research Center for Bioreaction to Reactive Oxygen Species and Biomedical Science Institute, School of Medicine, Graduate School, Kyung Hee University, Seoul 02447, Korea

<sup>3</sup> Department of Biomedical Science, Graduate School, Kyung Hee University, Seoul 02447, Korea

\* Correspondence to: [fsquan@khu.ac.kr](mailto:fsquan@khu.ac.kr) (FSQ)

## Supplementary Tables

**Supplementary Table S1.** *Plasmodium berghei* rhoptry-associated protein 1 (RAP1) sequence comparison. Nucleotide sequences of codon-optimized (RAP1) were obtained from GenScript, and compared with the original non-codon optimized RAP1 (XM\_034565422.1) sequence acquired from NCBI database.

|             |     |                                                                                                          |
|-------------|-----|----------------------------------------------------------------------------------------------------------|
| Optimized   | 1   | ATG <b>TT</b> CATCAAGATCGTGTCACTGTTCAT <b>CT</b> GTCCAGGCTGGTG <b>TT</b> CCAGGACTACTCA                   |
| Original    | 1   | ATGTTTATTAAAAATTGTAAGTTTGTTCATACTTTCCCGATTGGTGTTCAGATTATTCT                                              |
| Translation | 1   | M F I K I V S L F I L S R L V F Q D Y S                                                                  |
| Optimized   | 61  | <b>GT</b> CGCTTTCAACATCAGAGACTCCAACATCATCTCCA <b>AA</b> CTACAGCCACGGTTACAACAGC                           |
| Original    | 61  | GTGGCATTTAACATACGTGACTCTAATATTATATCAATTATTACATGGTTACAACAGC                                               |
| Translation | 21  | V A F N I R D S N I I S N Y S H G Y N S                                                                  |
| Optimized   | 121 | <b>CC</b> CGGCATCAACAACGACAAGCTGGGAAACCTGA <b>AA</b> CTACTTCA <b>CC</b> GAGATCTTCC <b>AA</b> AG          |
| Original    | 121 | CCAGGTCTAAACAATGATAAATTAGGCAATTTGAATTATTTACGGAAATCTTCCCCAA                                               |
| Translation | 41  | P G I N N D K L G N L N Y F T E I F P K                                                                  |
| Optimized   | 181 | AAG <b>G</b> AGCACGAAATCATCAACCTGTACGACGACGTGCAGGAGCTGCTGGGCAACGAACGC                                    |
| Original    | 181 | AAGGAACATGAAATTATTAATTTATATGATGATGTACAAGAATTGTTAGGAAATGAGCGA                                             |
| Translation | 61  | K E H E I I N L Y D D V Q E L L G N E R                                                                  |
| Optimized   | 241 | ATGTCT <b>TT</b> CTG <b>C</b> AGGAA <b>G</b> ACGACGACGTCA <b>ACC</b> CAGACAAGAA <b>CG</b> GTACTAGCAACAAG |
| Original    | 241 | ATGTCTTTTTTACAAGAAGATGATGATGTCAATCAAAATAAAAAATGGA <b>AA</b> CTTCTAATAAA                                  |
| Translation | 81  | M S F L Q E D D D V N Q N K N G T S N K                                                                  |
| Optimized   | 301 | TACGCT <b>CT</b> GTTCAACGGTAA <b>CC</b> TGATCGCCGACCTGAAGGAGGAAGAGCCTATCGACGAA                           |
| Original    | 301 | TACGCTTTATTTAATGGAAATTTAATAGCTGATTTAAAAGAAGAGGAACCAATTGATGAA                                             |
| Translation | 101 | Y A L F N G N L I A D L K E E E P I D E                                                                  |
| Optimized   | 361 | ACC <b>G</b> CTGAAGAGGAA <b>ACT</b> ATCAACGAGAA <b>CA</b> T <b>CG</b> ACGAA <b>AGA</b> ACACCTCAACTATCAAG |
| Original    | 361 | ACCGCCGAAGAGGAAACAATTAATGAAATATAGATGAAAAAATACATCAACTATAAAA                                               |
| Translation | 121 | T A E E E T I N E N I D E K N T S T I K                                                                  |
| Optimized   | 421 | <b>TAC</b> ACCCCGACTAC <b>ACT</b> CCACGCCTGAAGAA <b>G</b> GCTATGCACAC <b>CC</b> TGGGC <b>TAC</b> GACAAG  |
| Original    | 421 | TATACACCAGATTACACACCCCGTTTAAAAAAGCTATGCATACATTAGGCTATGATAAA                                              |
| Translation | 141 | Y T P D Y T P R L K K A M H T L G Y D K                                                                  |
| Optimized   | 481 | <b>GAG</b> TTCAAGCTGGCCGAA <b>CT</b> GACCACTATCCAG <b>TC</b> CTGCCCTAACGACA <b>ACT</b> TTCTGTTC          |
| Original    | 481 | GAATTTAAATTAGCTGAATTGACAACAATACAGTCATGTCCCAATGATAATTTTTTATTT                                             |
| Translation | 161 | E F K L A E L T T I Q S C P N D N F L F                                                                  |
| Optimized   | 541 | <b>GAC</b> ATCTTCCCCAGGCCATCCAGAAGTTCCAG <b>GAG</b> AAC <b>GAC</b> ATGA <b>AG</b> TACATCCAGACC           |
| Original    | 541 | GATATATTTCCCCAAGCAATACAAAAATTT <b>CAG</b> GA <b>AA</b> ACGATATGAAATACATACAACT                            |
| Translation | 181 | D I F P Q A I Q K F Q E N D M K Y I Q T                                                                  |
| Optimized   | 601 | <b>CAG</b> GGTGACCAGTACGTG <b>GAA</b> TGCATCAAGAAG <b>CACA</b> AGCTGGT <b>CGG</b> CTCAGACAAC <b>CAG</b>  |
| Original    | 601 | CAAGGGGATCAATATGTAGAATGTATTAAAAAGCATAAATTAGTTGGATCAGATAATCAG                                             |
| Translation | 201 | Q G D Q Y V E C I K K H K L V G S D N Q                                                                  |

|             |      |                                                               |
|-------------|------|---------------------------------------------------------------|
| Optimized   | 661  | GACCTGAAGCTGAACTTCGGAAACTCCGTGAACACTTTCGGTCCTTACAAGATCCCCAG   |
| Original    | 661  | GACTTGAAATTGAATTTTGGTAATTCAGTTAATACTTTTGGCCCATATAAAATACCACAA  |
| Translation | 221  | D L K L N F G N S V N T F G P Y K I P Q                       |
| Optimized   | 721  | AAGATGATCACCTTCGACCTGATCGCCTGCCAAGCAACATCACTCCTGTCAACCTGGCT   |
| Original    | 721  | AAAATGATTACCTTCGATTTAATCAGATTACCTTCAAATATTACTCCTGTTAATTTAGCA  |
| Translation | 241  | K M I T F D L I R L P S N I T P V N L A                       |
| Optimized   | 781  | AACGACTACTACCTGTCCGAGAGCGAGTTCCCAACCTGCACAAGCTGAACTACTGCCTG   |
| Original    | 781  | AATGATTATTATTTATCCGAAAGTGAATTTCCAAATTTGCATAAACTAAATTTATGTCTA  |
| Translation | 261  | N D Y Y L S E S E F P N L H K L N Y C L                       |
| Optimized   | 841  | CTGCACCCTGCCAAGCTGGAGAAGCTGCTGAAGCGTAAGGACATCAAGTCTTACATCAAC  |
| Original    | 841  | TTACACCCTGCAAAATTAGAAAAATTATTAAGAAAGAAAGATATTAATCATATATAAAT   |
| Translation | 281  | L H P A K L E K L L K R K D I K S Y I N                       |
| Optimized   | 901  | AACACCGAATCTGGATCATACGACAACCTTCTCAAGAAGGCTATGAACGAGAGCATCGAA  |
| Original    | 901  | AATACAGAATCTGGCTCTTATGATAATTTTTTAAGAAGGCTATGAATGAATCCATTGAA   |
| Translation | 301  | N T E S G S Y D N F F K K A M N E S I E                       |
| Optimized   | 961  | TGCCACGTGGAGAACACCCCTGCACATGATCCTGTCTAAGCTGACTCTGTTCATGTTCTTC |
| Original    | 961  | TGCCATGTTGAAAATACATTACATATGATATTATCAAACTCACACTTTTATGTTCTTT    |
| Translation | 321  | C H V E N T L H M I L S K L T L F M F F                       |
| Optimized   | 1021 | AACGTCAACAGCCAGACTCCAAGAACATCCTGAAGAAGCAGCTGTACATCATCAAGTCT   |
| Original    | 1021 | AATGTTAAACAAACCAGATTCTAAGAATATCCTTAAGAAGCAATTGTACATAATAAATCA  |
| Translation | 341  | N V N K P D S K N I L K K Q L Y I I K S                       |
| Optimized   | 1081 | GGCCTGTCATACCGCTCCCGTAAGTACGTGGACAACGCCTACAAGAAGGTCATCAACAAC  |
| Original    | 1081 | GGGCTAAGTTATAGAAGTAGAAAAATATGTCGATAATGCTTATAAGAAGGTTATAAACAAT |
| Translation | 361  | G L S Y R S R K Y V D N A Y K K V I N N                       |
| Optimized   | 1141 | TTCAAGGACTACGAGAACAAGATCAAGCTGATCGACAGCAACCTGGAAAACATCACCTCT  |
| Original    | 1141 | TTTAAAGATTACGAAAACAAAATAAAATTGATTGATTCCAATTTGGAGAATATAACTTCG  |
| Translation | 381  | F K D Y E N K I K L I D S N L E N I T S                       |
| Optimized   | 1201 | TACTACGCTGCCACGCTTTCGGAAACCTGTGCAACACTTACATGAGAGAAGGACAACATC  |
| Original    | 1201 | TACTATGCCGCGCATGCTTTTGGTAATTTATGCAACACATATATGGAAAAAGATAATATA  |
| Translation | 401  | Y Y A A H A F G N L C N T Y M E K D N I                       |
| Optimized   | 1261 | TACGAAGCTAAGCCTACCTGTACGAGCACATCGCCCTAGCATCAAGATCTTCTCCAGC    |
| Original    | 1261 | TATGAAGCAAATGCATATTTGTATGAGCACATTGCTCCATCCATTAATAATTTCTCTTCT  |
| Translation | 421  | Y E A N A Y L Y E H I A P S I K I F S S                       |

|             |      |                                                                |
|-------------|------|----------------------------------------------------------------|
| Optimized   | 1321 | TGCATCAAGCACCTGACCATCTACAACCTACATCATCTCAAACCTGCTGGGCCAGGTGAAG  |
| Original    | 1321 | TGTATTAAACATTTGACAATTTATAATTATATTATATCAAATTTACTTGGTACCGTAAAA   |
| Translation | 441  | C I K H L T I Y N Y I I S N L L G Q V K                        |
| Optimized   | 1381 | CACCTGATGTCCTACACTCCTAGGAAGCCCATCCTGAAGGACATCCACTTCAAGGCTCTG   |
| Original    | 1381 | CATTTAATGAGTTATACCCCTAGAAAACCAATATTTAAAAGATATACATTTTAAGGCTCTT  |
| Translation | 461  | H L M S Y T P R K P I L K D I H F K A L                        |
| Optimized   | 1441 | CTGAACAAGTTCAAGAAGCCTCAGAACGTGAACGAGCTGCCATACGACCTACCGTCAAG    |
| Original    | 1441 | TTAAACAAATTTAAAAAACCCAAAATGTAAATGAACTTCCATATGACCCAACTGTAA      |
| Translation | 481  | L N K F K K P Q N V N E L P Y D P T V K                        |
| Optimized   | 1501 | TCATTTCGCCCTGGGCGAGCTGACTAGAGAACCCATCCACGGACTGATCCACTCCTACTTC  |
| Original    | 1501 | TCATTTGCACTTGGTGAATTAACGAGAGAACCTATTCATGGTTTAATTCATTCGTACTTT   |
| Translation | 501  | S F A L G E L T R E P I H G L I H S Y F                        |
| Optimized   | 1561 | GAATACAAGAAGAAGGACCTGCTGGACATCATGCAGAAGCTGAAGCTGGACATCTTCAGC   |
| Original    | 1561 | GAATATAAGAAAAAGACCTATTAGATATTATGCAGAAGCTCAAATTAGATATTTTTTCA    |
| Translation | 521  | E Y K K K D L L D I M Q K L K L D I F S                        |
| Optimized   | 1621 | CTGGCTAACAAGGACCTGAAGTTCCCTCTGCCGACCTGCCAGACTACAAGCTGTTCAAG    |
| Original    | 1621 | CTTGCTAATAAAGATTTTAAATTTCCAAGTGCCGATTGCGCAGATTATAAATTGTTTAA    |
| Translation | 541  | L A N K D L K F P S A D L P D Y K L F K                        |
| Optimized   | 1681 | GACATCGTGAACAAGTACAAGAAGGAGATCAAGATCCTGTTCCAGGAGATGAACAGCGAA   |
| Original    | 1681 | GATATAGTCAATAAATATAAAAAAGAAATCAAAATTTTATTCCAAGAAATGAATTCTGAA   |
| Translation | 561  | D I V N K Y K K E I K I L F Q E M N S E                        |
| Optimized   | 1741 | TACGTC AAGCTGTTCAAGATGCGCATCTCTGCTTTCCTACCAGAAGGACTTCTTCATCTAC |
| Original    | 1741 | TATGTCAAACCTTTTAAATGCGTATTTTCAGCATTCTACCAAAGGACTTTTATTTAT      |
| Translation | 581  | Y V K L F K M R I S A F Y Q K D F F I Y                        |
| Optimized   | 1801 | GACCGTGTCTTCTAA                                                |
| Original    | 1801 | GATCGTGTATTCTAA                                                |
| Translation | 601  | D R V F                                                        |

## Supplementary Figures

**A. MSP-8 (Size: 45 kDa)**

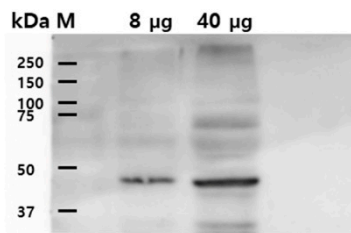

**B. MSP-9 (Size: 68 kDa)**

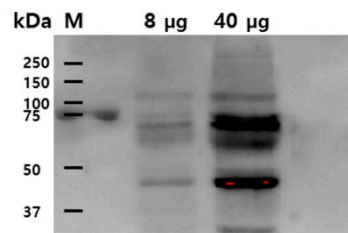

**C. RAP1 (Size: 67 kDa)**

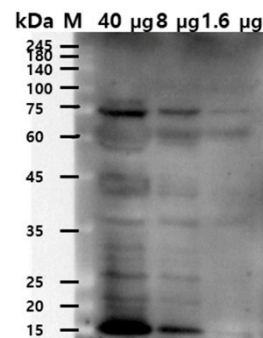

**Supplementary Figure S1.** The original uncropped western blot images of merozoite surface protein 8 (MSP-8, **A**), merozoite surface protein 9 (MSP-9, **B**), and rhoptry-associated protein 1 (RAP1, **C**) of *Plasmodium berghei*.
